# Supplementary material for: Unique AAO films with adjustable hierarchical microstructures
Source: Royal Society of Chemistry journal article supplement (doi:10.1039/c4ra13076f), 2014-11-24
Supplement: c4ra13076f1.pdf [file c4ra13076f1.pdf]

## Supporting Information

### **Unique AAO films with adjustable hierarchical microstructures**

Yi Li,\* Yuyan Qin, Zhiyuan Ling, Xing Hu and Yanhua Shen

*Department of Electronic Materials Science and Engineering, College of Materials Science and Engineering,*

*South China University of Technology, Guangzhou 510641, People's Republic of China.*

*E-mail: msllyi@scut.edu.cn; Fax: +86 20 8711 1224; Tel: +86 20 8711 1224*

## Experimental and instrumental details

High-purity (99.999 %) aluminium sheets with a thickness of 1 mm were used in the present experiments. Before anodization, the sheets were electropolished at 0–5 °C and 21 V for 5 min in a mixed solution of analytically pure perchloric acid and ethanol (1:4, v/v) to diminish the surface roughness. Then the sheet was carefully washed with de-ionized water and put into a tailor-made holder with a square area of 1 cm<sup>2</sup> exposed to the electrolyte. The first anodization were conducted in electrolyte I (0.3 M oxalic acid electrolyte) and electrolyte II (electrolyte I–ethanol = 1 : 1 v/v), respectively, with vigorous magnetic stirring and a low temperature (~3 °C). A powerful low temperature water bath, together with an electrolysis cell (1 L) was used in the anodization process, and the heat was effectively removed by using a large copper plate which was in thermal contact with the aluminium sheets. In addition, the first anodization processes were performed as follows: (1) the anodization voltage ( $U_a$ ) was linearly increased at a rate of 1 V s<sup>-1</sup> until the current density ( $i_a$ ) reached the setting value (500 or 600 A m<sup>-2</sup>), (2) a constant-current process was applied, by using which the  $U_a$  can be smoothly increased to the high target value, (3) the anodization was conducted at a designated  $U_a$  with a constant-voltage mode, and unique AAO films with aluminium substrates (AAO-Al sheets) were obtained at 180 A m<sup>-2</sup>. For the characterization of the barrier layer surface of AAO films, a saturated CuCl<sub>2</sub> solution was applied to remove the residual aluminium substrate. Pre-patterned aluminium sheets were obtained by dissolving the AAO films of AAO-Al sheets in a mixture solution of CrO<sub>3</sub> (30 g L<sup>-1</sup>) and H<sub>3</sub>PO<sub>4</sub> (50 mL L<sup>-1</sup>) at ~70 °C for 10 h. The second anodization was conducted in 0.3 M oxalic acid electrolyte (~3 °C) under 40 V for 8 min. The subsequent pore widening process was performed in 5wt% H<sub>3</sub>PO<sub>4</sub> solution under 30 °C for 25 min. The microstructures of the samples were examined by a field-emission scanning electron microscope (FE-SEM: ZEISS Ultra 55). The anodization voltage and current were measured by multimeters (Keithley 2010 and 2410).

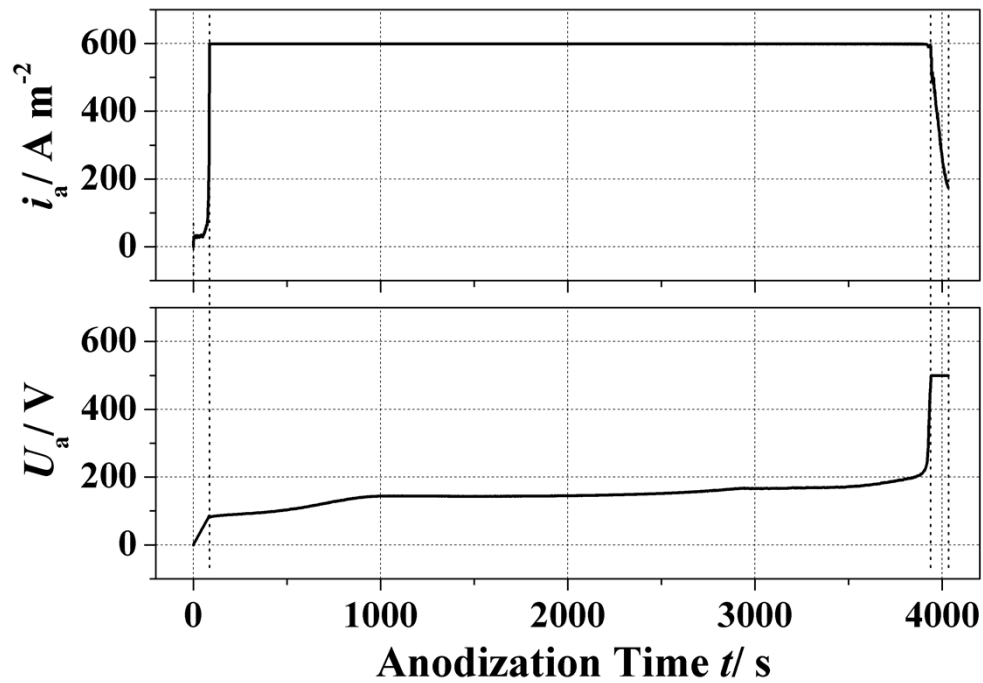

**Fig. S1** The evolutions of the anodization current density ( $i_a$ ) and the anodization voltage ( $U_a$ ) as a function of the anodization time ( $t$ ) (voltage increasing rate:  $1 \text{ V s}^{-1}$ , setting current density:  $600 \text{ A m}^{-2}$ ,  $0.3 \text{ M}$  oxalic acid electrolyte), corresponding to the AAO film shown in Fig. 1.

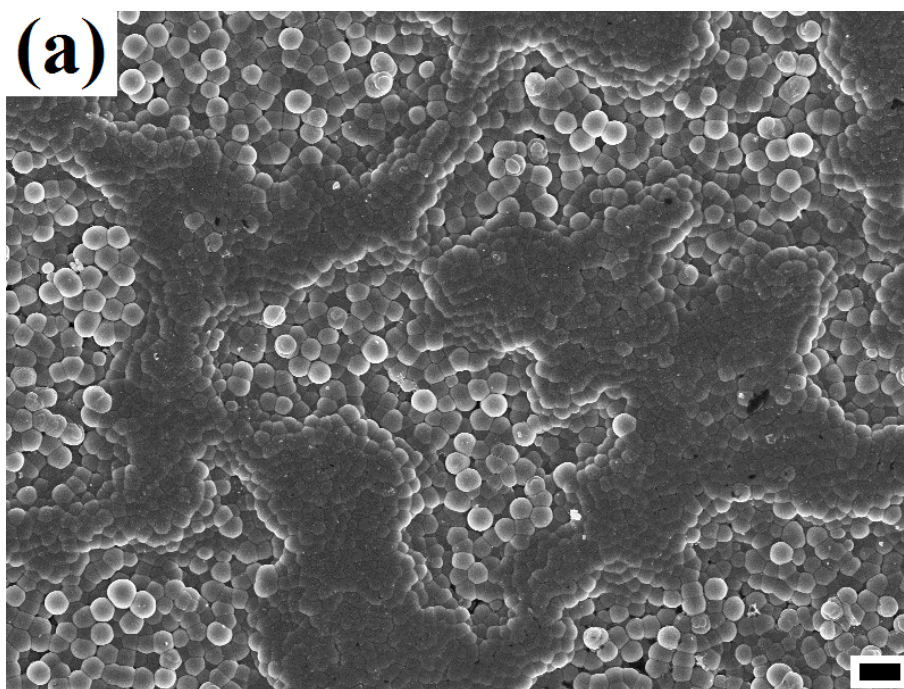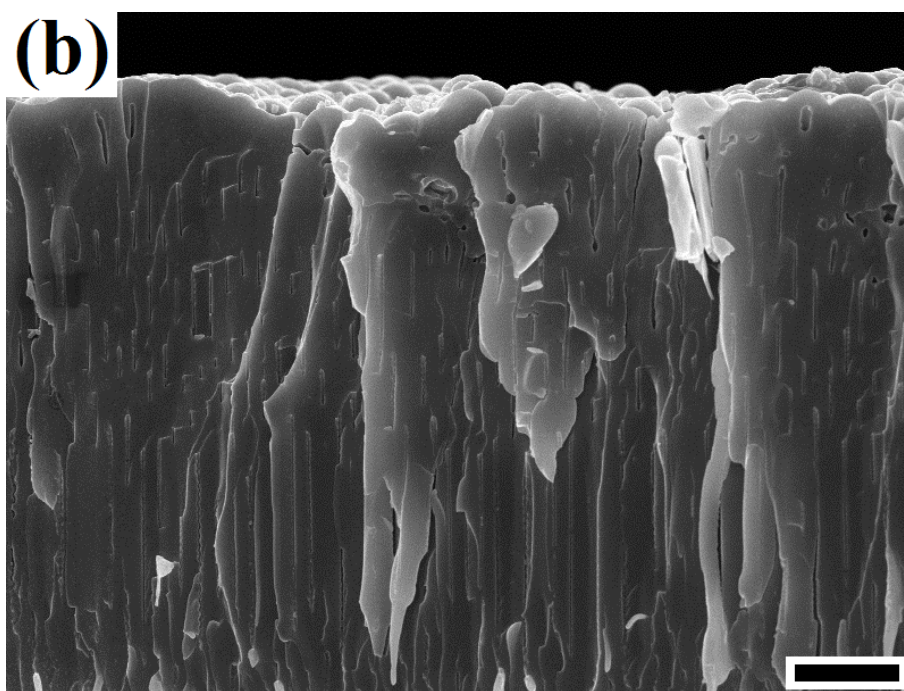

**Fig. S2** Corresponding to the images in Fig. 1, enlarged SEM images of the AAO film (voltage increasing rate:  $1 \text{ V s}^{-1}$ , setting current density:  $600 \text{ A m}^{-2}$ ,  $0.3 \text{ M}$  oxalic acid electrolyte), scale bars =  $2 \text{ }\mu\text{m}$ , (a) the barrier layer surface, (b) the cross-section.

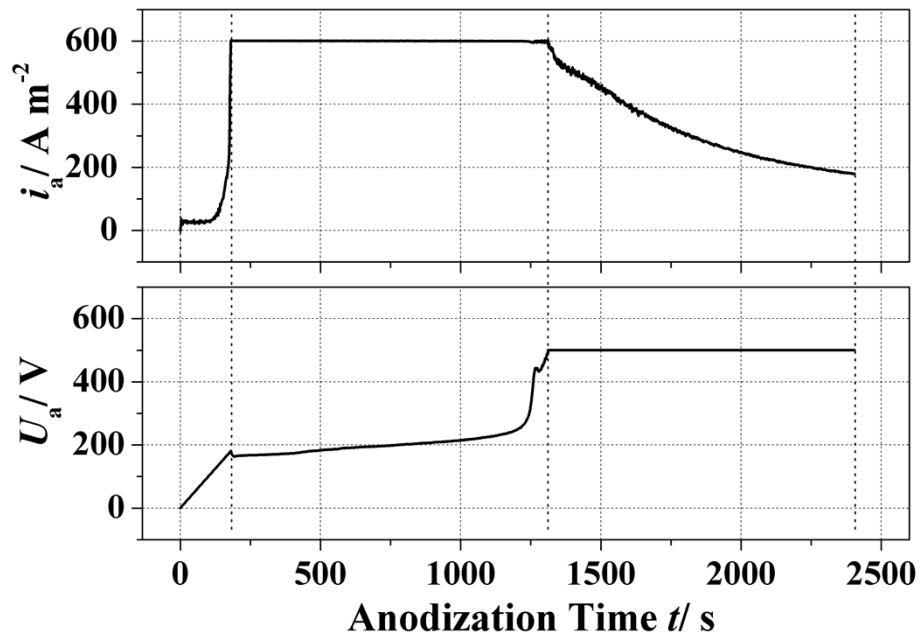

**Fig. S3** The evolutions of the anodization current density ( $i_a$ ) and the anodization voltage ( $U_a$ ) as a function of the anodization time ( $t$ ), (b) SEM images of the AAO film (voltage increasing rate:  $1 \text{ V s}^{-1}$ , setting current density:  $600 \text{ A m}^{-2}$ ,  $0.3 \text{ M}$  oxalic acid electrolyte–ethanol =  $1 : 1 \text{ v/v}$ ), corresponding to the AAO film shown in Fig. 2.

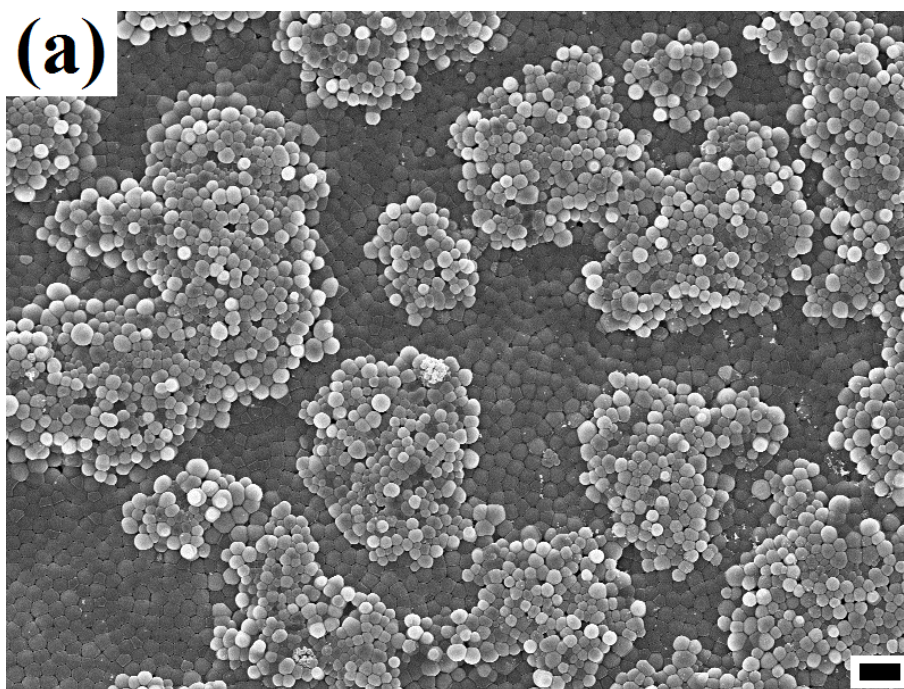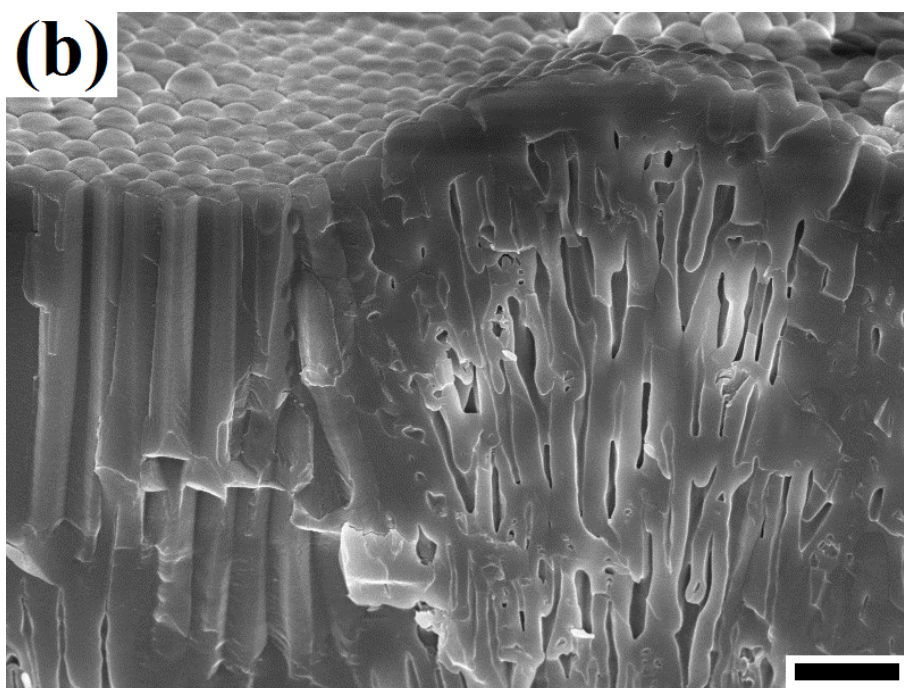

**Fig. S4** Corresponding to the images in Fig. 2, enlarged SEM images of the AAO film (voltage increasing rate:  $1 \text{ V s}^{-1}$ , setting current density:  $600 \text{ A m}^{-2}$ , 0.3 M oxalic acid electrolyte–ethanol = 1 : 1 v/v), scale bars =  $2 \mu\text{m}$ , (a) the barrier layer surface, (b) the cross-section.

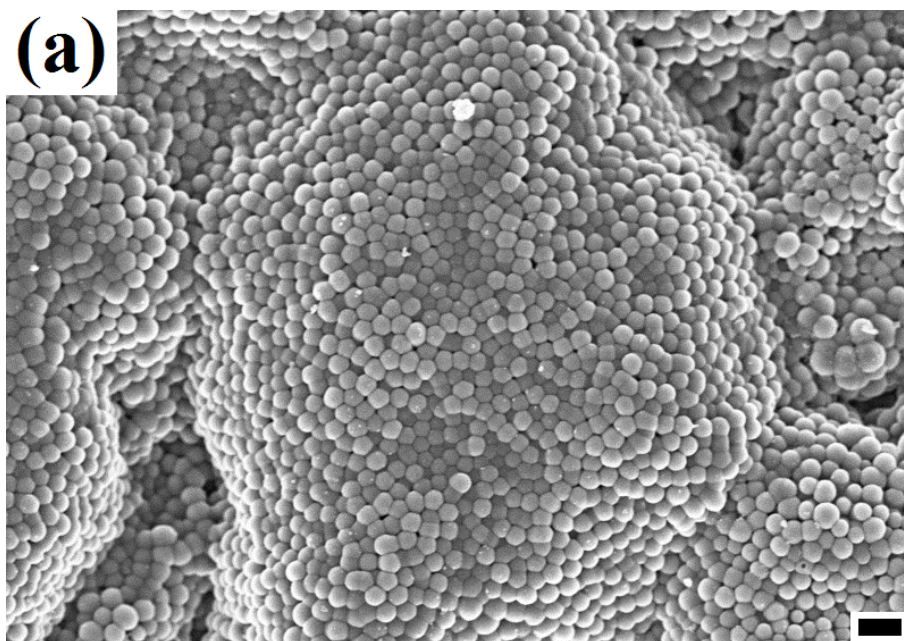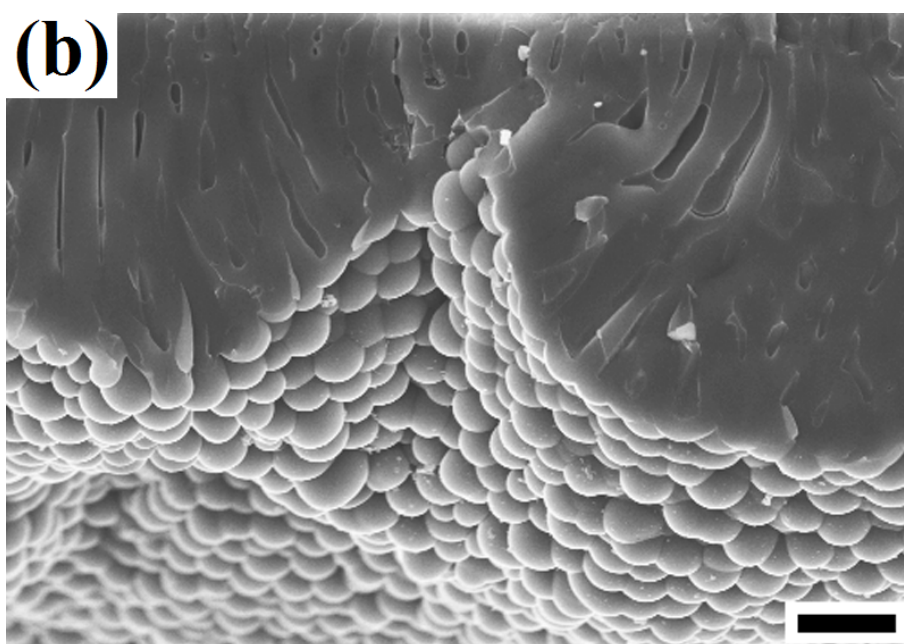

**Fig. S5** Corresponding to the image in Fig. 3(a), SEM images of the AAO film (voltage increasing rate:  $1 \text{ V s}^{-1}$ , setting current density:  $500 \text{ A m}^{-2}$ ,  $0.3 \text{ M}$  oxalic acid electrolyte), scale bars =  $2 \text{ }\mu\text{m}$ , (a) the barrier layer surface, (b) the cross-section.

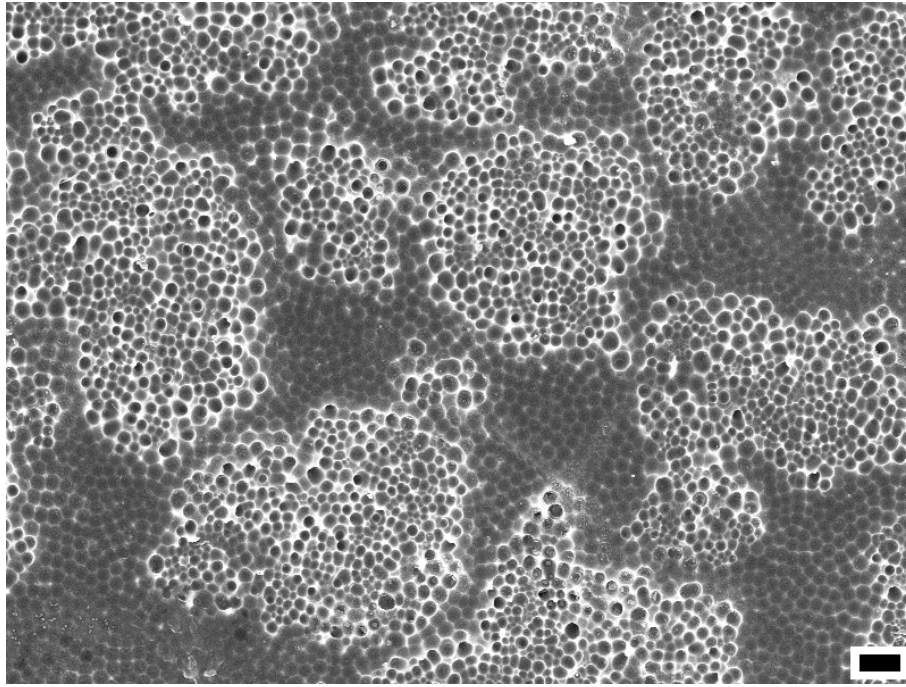

**Fig. S6** The enlarged SEM image of the patterned aluminium substrate which can be obtained by removing the as-prepared AAO film, corresponding to the sample shown in Fig. 2 and Fig. S4, scale bar = 2  $\mu\text{m}$ .
